# Supplementary material
Source: publisher figshare collection journal article supplement (https://acs.figshare.com/ndownloader/files/12274790)
Supplement: Supplementary file 1 [file 12274790]

# Supplementary Information for

## Combined Approach to Remove and Fast Detect Heavy Metals in Water Based on PES-TiO<sub>2</sub> Electrospun Mats and Porphyrin Chemosensors.

Giulia Ognibene,<sup>a</sup> Chiara M.A Gangemi,<sup>b</sup> Alessandro D'Urso,<sup>b</sup> Roberto Purrello,<sup>b</sup> Gianluca Cicala<sup>c</sup> and Maria Elena Fragalà<sup>a\*</sup>

<sup>a</sup>Dipartimento di Scienze Chimiche and INSTM UdR di Catania, Università di Catania, Viale Andrea Doria, 6- 95100 Catania- Italy

<sup>b</sup>Dipartimento di Scienze Chimiche, Università di Catania, Viale Andrea Doria, 6- 95100 Catania-Italy

<sup>c</sup>DICAR and INSTM UdR di Catania, Università di Catania, Viale Andrea Doria, 6- 95100 Catania- Italy

### Contents

1. **Figure S1:** Intensity ratio of components at  $\lambda=476$  nm and  $\lambda=423$  nm ( $I_{476}/I_{423}$ ) vs  $Pb^{2+}$  concentration in water. UV-Vis spectra of H2T4 aqueous solution (1  $\mu$ M) were recorded in presence of increasing concentration of  $Pb^{2+}$  ions. Spectra measurements have been performed 15 minutes after addition of aliquots of  $Pb(NO_3)_2$  stock solution (1 mM) to 2.5 ml of H2T4 solution.  $Pb^{2+}$  concentration ranges from 0.25  $\mu$ M to 5  $\mu$ M.
2. **Figure S2:** UV-Vis absorption spectra of H2T4 1  $\mu$ M (black line) in presence of  $[Pb^{2+}]=5$   $\mu$ M (red line); after 24 hrs (green line) and 48 hrs (blue line) mats dipping. Prolonged dipping of PES/TiO<sub>2</sub> mats in this solution results in a decrease of  $Pb^{2+}$  concentration to about 1  $\mu$ M in 24 hrs and 0.25  $\mu$ M in 48 hrs, in good agreement with data reported in Figure S1.
3. **Figure S3:** UV-Vis absorption spectra of H2T4 1  $\mu$ M (black line) in presence of  $Zn^{2+}$  ions having concentration of 500  $\mu$ M (red line) and 5 mM (green line), respectively. Spectra measurements have been performed after 1 hour from porphyrin addition (shorter time is not enough to provide a detectable metalation).
4. **Figure S4:** UV-Vis absorption spectra of H2T4 deposited on glass before (black line) and after dipping in aqueous solutions containing  $[Zn^{2+}]=1\mu$ M (red line) and  $[Zn^{2+}]=5$   $\mu$ M (green line). UV-Vis spectra of H2T4 deposited on glass before and after dipping in aqueous solutions containing  $Zn^{2+}$  ions having a concentration of 1  $\mu$ M and 5  $\mu$ M. Soret band red-

shift and spectral modification in the Q-bands region provide evidence of formation of ZnT4 derivatives on glass surface.

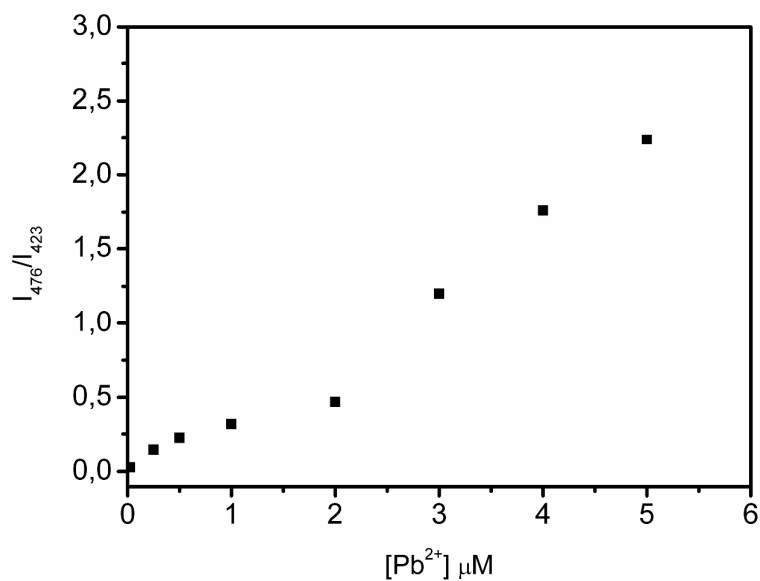

**Figure S1**

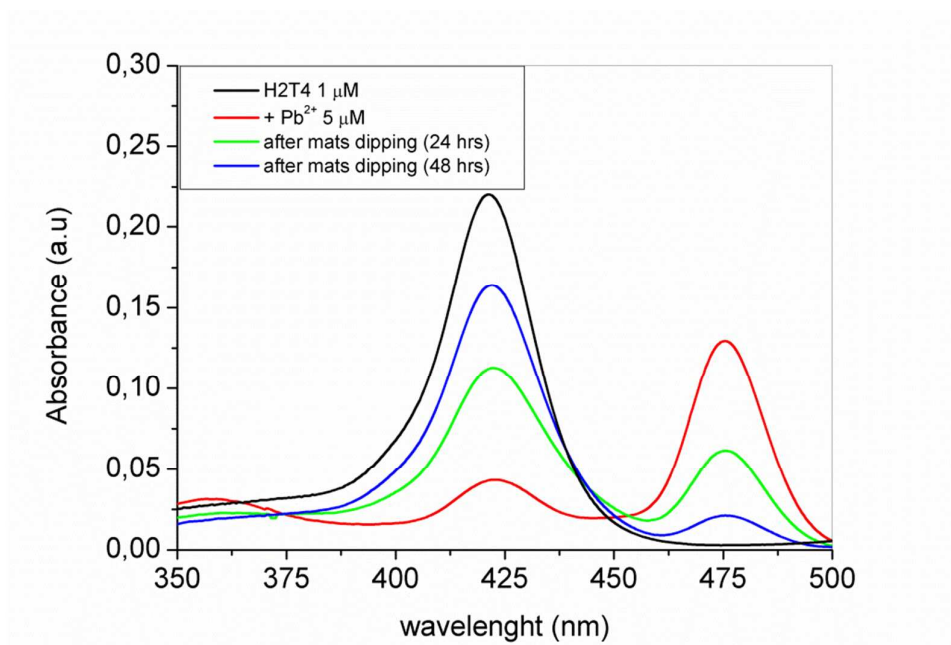

**Figure S2**

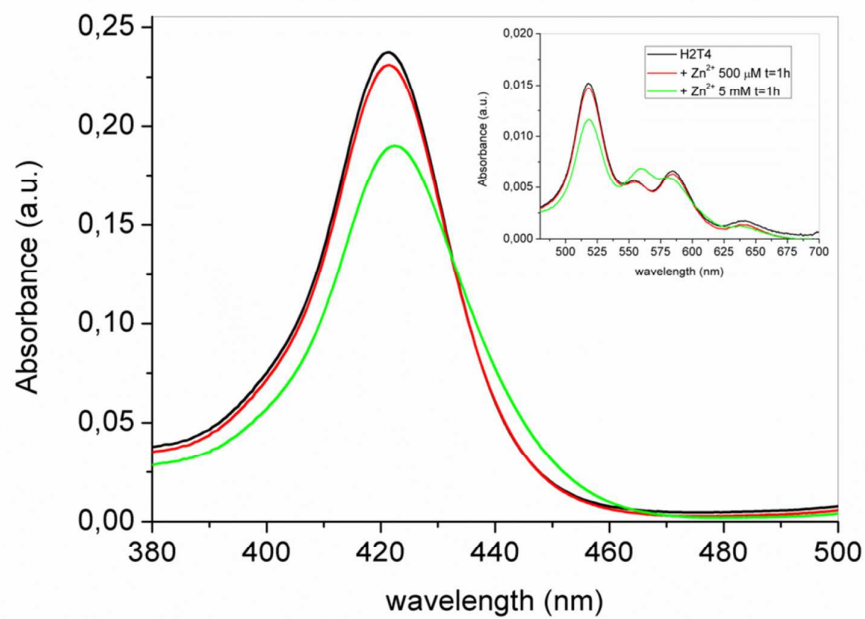

**Figure S3**

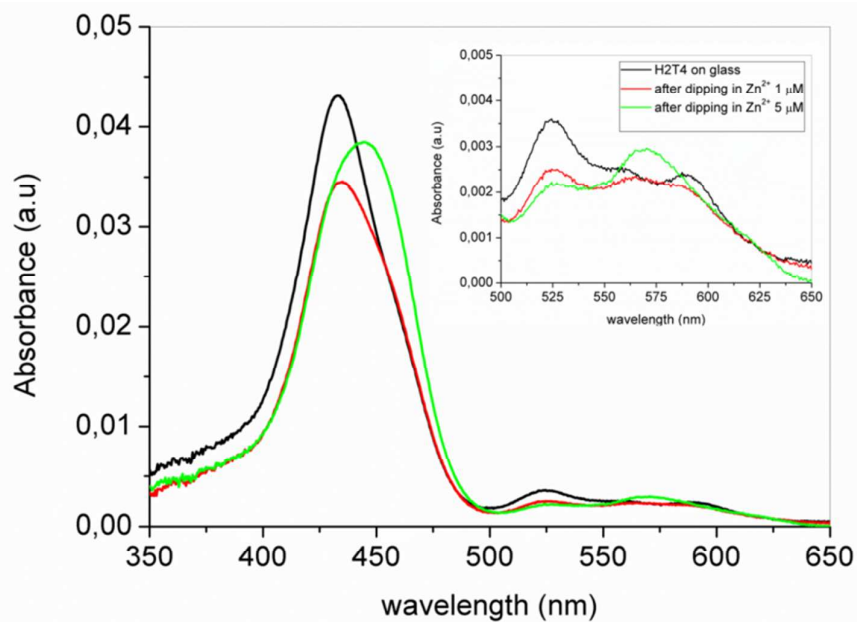

**Figure S4**
